# Supplementary material for: Respiratory Syncytial Virus-Specific Antibodies and Atopic Diseases in Children: A 10-Year Follow-Up
Source: MDPI journal article supplement (doi:10.3390/pathogens12040546), 2023-04-01
Supplement: s1 [file s1]

# Supplementary Materials:

**Table S1.** Socio-demographic characteristics of included children up to the age of 10 (N = 72).

|                                                            |                                               | N (%)        | Median (25 <sup>th</sup> , 75 <sup>th</sup> ) |
|------------------------------------------------------------|-----------------------------------------------|--------------|-----------------------------------------------|
| Gender                                                     | Female                                        | 30 (41.67 %) |                                               |
|                                                            | Male                                          | 42 (58.33 %) |                                               |
| Family history                                             | Negative                                      | 28 (38.89 %) |                                               |
|                                                            | Positive                                      | 44 (61.11 %) |                                               |
| Gestational age (days)                                     |                                               |              | 274.0 (271.0–280.0)                           |
| Mode of delivery                                           | Vaginal                                       | 53 (73.61 %) |                                               |
|                                                            | Caesarean section (CS)                        | 19 (26.39 %) |                                               |
| Birth weight (g)                                           |                                               |              | 3405.0(3150.0–3680.0)                         |
| Birth length (cm)                                          |                                               |              | 50.0 (48.5–50.0)                              |
| Head circumference (cm)                                    |                                               |              | 34.5 (33.5–35.0)                              |
| Neonatal pathology                                         | Without                                       | 43 (59.72 %) |                                               |
|                                                            | Hyperbilirubinemia                            | 13 (18.06 %) |                                               |
|                                                            | Hyperbilirubinemia and neonatal infection     | 12 (16.67 %) |                                               |
|                                                            | Asphyxia and neonatal infection               | 2 (2.78 %)   |                                               |
|                                                            | Apnea and pneumothorax and neonatal infection | 1 (1.39 %)   |                                               |
|                                                            | Convulsions                                   | 1 (1.39 %)   |                                               |
| Animals (1 <sup>st</sup> year)                             | No                                            | 30 (42.25 %) |                                               |
|                                                            | Yes                                           | 41 (57.75 %) |                                               |
| Animals (2 <sup>nd</sup> year)                             | No                                            | 32 (45.07 %) |                                               |
|                                                            | Yes                                           | 39 (54.93 %) |                                               |
| Number of adults in the household (1 <sup>st</sup> year)   |                                               |              | 2.0 (2.0–2.0)                                 |
| Number of children in the household (1 <sup>st</sup> year) |                                               |              | 2.0 (1.0–2.0)                                 |
| Number of adults in the household (2 <sup>nd</sup> year)   |                                               |              | 2.0 (2.0–2.0)                                 |
| Number of children in the household (2 <sup>nd</sup> year) |                                               |              | 2.0 (1.0–3.0)                                 |
| Nursery                                                    | No                                            | 62 (87.32 %) |                                               |
|                                                            | Yes                                           | 9 (12.68 %)  |                                               |
| Maternal smoking during pregnancy                          | No                                            | 52 (72.22 %) |                                               |
|                                                            | Yes                                           | 20 (27.78 %) |                                               |
| Household smoking                                          | No                                            | 43 (59.72 %) |                                               |
|                                                            | Yes                                           | 29 (40.28 %) |                                               |
| Exclusive breastfeeding (months)                           |                                               |              | 3.0 (0.0–6.0)                                 |
| Total breastfeeding (months)                               |                                               |              | 4.5 (2.0–12.8)                                |

Continuous variables are presented as medians and 25th and 75th percentiles, and categorical variables are presented as frequencies (n) and percentages (%).

**Table S2.** Clinical characteristics of included children up to the age of 10 (N = 72).

|                               |     | N (%)       | Median (25 <sup>th</sup> , 75 <sup>th</sup> ) |
|-------------------------------|-----|-------------|-----------------------------------------------|
| Recurrent wheezing 2–10 years | No  | 50 (69.4 %) |                                               |
|                               | Yes | 22 (30.6 %) |                                               |
| Wheezing current              | No  | 57 (79.2 %) |                                               |
|                               | Yes | 15 (20.8 %) |                                               |
| Recurrent wheezing < 2 years  | No  | 60 (83.3 %) |                                               |
|                               | Yes | 12 (16.7 %) |                                               |

|                                           |                                    | N (%)       | Median (25 <sup>th</sup> , 75 <sup>th</sup> ) |
|-------------------------------------------|------------------------------------|-------------|-----------------------------------------------|
| Atopic dermatitis<br>< 10 years           | No                                 | 54 (75.0 %) |                                               |
|                                           | Yes                                | 18 (25.0 %) |                                               |
| Atopic dermatitis<br>current              | No                                 | 65 (90.3 %) |                                               |
|                                           | Yes                                | 7 (9.7 %)   |                                               |
| Allergic rhinitis<br>< 10 years           | No                                 | 40 (55.6 %) |                                               |
|                                           | Yes                                | 32 (44.4 %) |                                               |
| Allergic rhinitis<br>current              | No                                 | 43 (59.7 %) |                                               |
|                                           | Yes                                | 29 (40.3 %) |                                               |
| Allergic rhinoconjunctivitis<br><10 years | No                                 | 58 (80.6 %) |                                               |
|                                           | Yes                                | 14 (19.4 %) |                                               |
| Allergic rhinoconjunctivitis<br>current   | No                                 | 59 (81.9 %) |                                               |
|                                           | Yes                                | 13 (18.1 %) |                                               |
| Groups                                    | Elevated total IgE                 | 6 (8.3 %)   |                                               |
|                                           | Monosensitization                  | 20 (27.8 %) |                                               |
|                                           | Polysensitization                  | 24 (33.3 %) |                                               |
|                                           | Negative total and<br>specific IgE | 22 (30.6 %) |                                               |
| Absolute eosinophil count >300/mcL        | No                                 | 50 (69.4 %) |                                               |
|                                           | Yes                                | 22 (30.6 %) |                                               |
| FeNO (ppb)                                |                                    |             | 8 (6–13)                                      |
| Vitamin D (mcg/mL)                        |                                    |             | 21 (16–25)                                    |
| Absolute eosinophil count (mcL)           |                                    |             | 200.00 (120.00–330.00)                        |
| IgE (IU/mL)                               |                                    |             | 75.13 (39.01–238.50)                          |

Continuous variables are presented as medians and 25th and 75th percentiles, and categorical variables are presented as frequencies (n) and percentages (%).
